# Supplementary material for: Advancing the Measurement of Patient Safety Culture: Development and Psychometrics of the AHRQ SOPS Hospital Survey Version 2.0
Source: Research Square preprint supplement (doi:10.21203/rs.3.rs-7829818/v1), 2025-12-17
Supplement: Supplementary file 1 [file 33f3c3675ef16d04e6d1eafd.docx]

**Supplemental Table 2. Listing of pilot survey items dropped from the final HSOPS 2.0**

Based on TEP recommendations, psychometric analyses indicating which items performed better, and conceptual considerations (e.g., item content that overlapped with other items), we dropped the following 11 items from the draft HSOPS 2.0 survey to create the final HSOPS 2.0 survey:

**Communication Openness**

1. C1. In this unit, staff are encouraged to come up with ideas about ways to improve patient safety.

**Handoffs and Information Exchange**

1. F2R. Problems often occur in the exchange of information across hospital units. (negatively worded)
2. F9. Staff follow standardized procedures when conducting handoffs.

**Hospital Management Support for Patient Safety**

1. F3. Hospital management regularly walks around units to ask staff about patient safety issues.

**Organizational Learning – Continuous Improvement**

1. A8. When a patient safety error happens in this unit, changes are made to prevent it from happening again.
2. A16. This unit tries out new work processes before making a permanent change.

**Response to Error**

1. A15R. When a patient safety error happens in this unit, someone is blamed. (negatively worded)
2. A18. After a patient safety error happens in this unit, work processes are reviewed to see if they contributed to the error.
3. A20R. Staff in this unit worry that mistakes they make are kept in their personnel file. (negatively worded)

**Supervisor, Manager, or Clinical Leader Support for Patient Safety**

1. B3R. My supervisor, manager, or clinical leader overlooks patient safety problems that happen again and again.

**Teamwork**

1. A3. In this unit, staff treat each other with respect.
