# Supplementary material for: Advancing the Measurement of Patient Safety Culture: Development and Psychometrics of the AHRQ SOPS Hospital Survey Version 2.0
Source: Research Square preprint supplement (doi:10.21203/rs.3.rs-7829818/v1), 2025-12-17
Supplement: Supplementary file 2 [file 3df2d66bedb8eab763b454e9.docx]

**Supplemental Table 1. Web-based User Feedback on Proposed Changes to the HSOPS 1.0 Survey From SOPS Hospital Database Submitters**

AHRQ is working on a revision to the current Hospital SOPS survey that was first released in 2004. Hospital SOPS survey users have made suggestions and requests for certain types of changes to the survey, which we list below. To help us develop Version 2.0, for each suggested change below, please indicate YES if you support the proposed change, or NO if you do not want to see this change.

Total N of respondents = 169

| **Proposed changes to the survey** | **YES I support this change** | **NO I do not support this change** |
| --- | --- | --- |
| a. Reduce the number of negatively worded items. | 82%  139 | 18%  30 |
| b. Add more hospital work areas/units (so fewer respondents answer "Other"). | 92%  156 | 8%  13 |
| c. Add more hospital staff positions (so fewer respondents answer "Other"). | 93%  157 | 7%  12 |
| d. Add a "Does Not Apply/Don't Know" response category. | 91%  153 | 9%  16 |
| e. Change the response options for the patient safety grade question.   Current: Failing, Poor, Acceptable, Very good, Excellent   Suggested: Poor, Fair, Good, Very good, Excellent | 85%  144 | 15%  25 |
| f. Update and rename the "Nonpunitive Response to Error" dimension to focus on just culture concepts that emphasize the role of systems, fairness, and individual accountability. | 89%  151 | 11%  18 |

[Open-ended question] Are there any other changes/edits/deletions/additions you would like to suggest for the Hospital SOPS Version 2.0 updated survey?
